# Supplementary material for: Single-cell analysis reveals gene-expression heterogeneity in syntrophic dual-culture of Desulfovibrio vulgaris with Methanosarcina barkeri
Source: PubMed Central journal article supplement — Sci Rep. 2014 Dec 15;4:7478. doi: 10.1038/srep07478 (PMC4265775; doi:10.1038/srep07478), 2014-12-15
Supplement: srep07478-s1.pdf [file srep07478-s1.pdf]

**Single-cell analysis reveals gene-expression heterogeneity in  
syntrophic dual-culture of *Desulfovibrio vulgaris* with  
*Methanosarcina barkeri***

Zhenhua Qi <sup>1,2,3</sup>, Guangsheng Pei <sup>1,2,3</sup>, Lei Chen <sup>1,2,3</sup>, Weiwen Zhang <sup>1, 2, 3, \*</sup>

<sup>1</sup> *Laboratory of Synthetic Microbiology, School of Chemical Engineering & Technology,  
Tianjin University, Tianjin 300072, P.R. China;* <sup>2</sup> *Key Laboratory of Systems  
Bioengineering (Ministry of Education), Tianjin University, Tianjin, 300072, P.R. China;*  
<sup>3</sup> *SynBio Research Platform, Collaborative Innovation Center of Chemical Science and  
Engineering (Tianjin), 300072, P.R. China.*

\* To whom all correspondence should be addressed:

Prof. Dr. Weiwen Zhang

School of Chemical Engineering & Technology

Tianjin University, Tianjin 300072

People's Republic of China

Tel : 0086-22-2740-6394; Fax : 0086-22-2740-6364;

Email: [wwzhang8@tju.edu.cn](mailto:wwzhang8@tju.edu.cn)

**Running title:** Single-cell analysis of syntrophic dual-culture

**Supplementary materials available online:**

**Suppl. Fig. S1. Standard curve for qPCR threshold cycle ( $C_T$ ) versus the logarithmic values (base 10) of the *D. vulgaris* cell number. Correlation coefficients ( $R^2$ ) and correlation equation shown.**

**Suppl. Table S1. All RT-qPCR primers designed and evaluated for 9 genes in this study.**

Suppl. Fig. 1

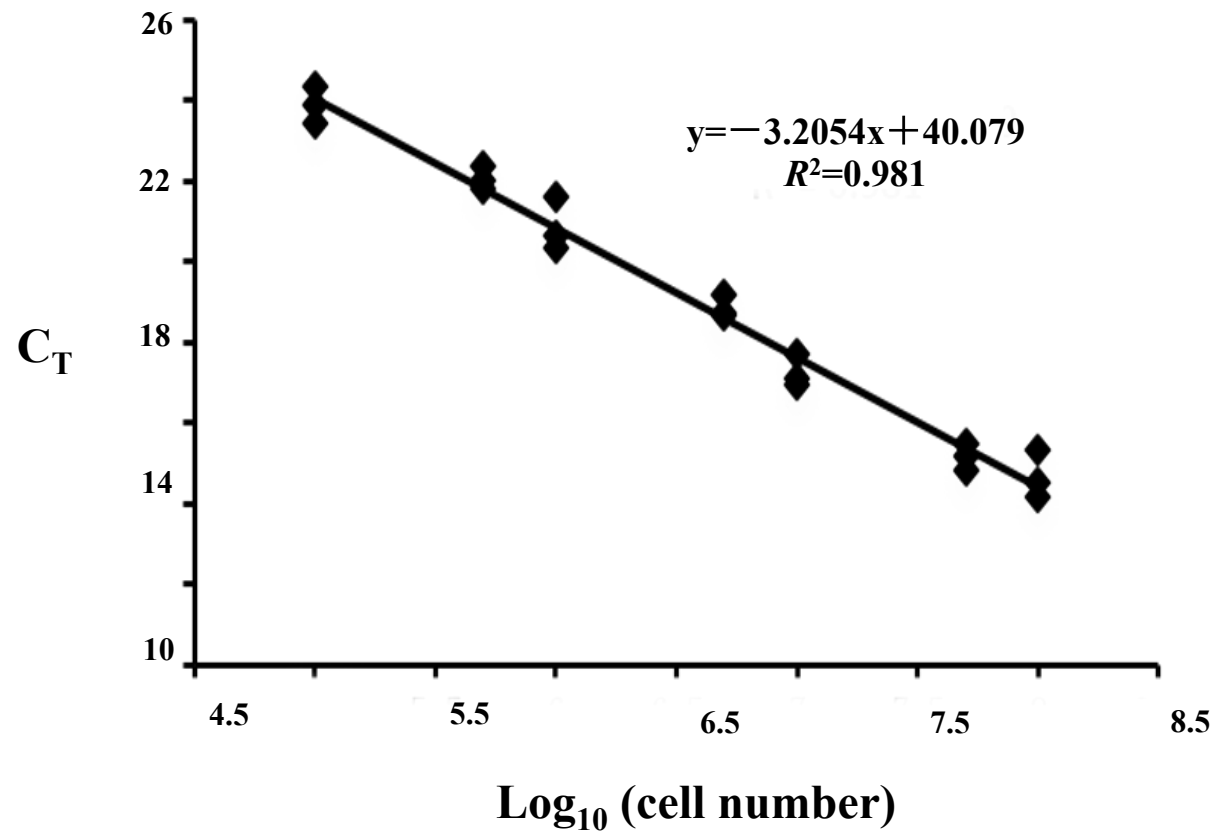

Suppl. Table S1. All RT-qPCR primers designed and evaluated for 9 genes in this study.

| Gene ID | Gene name     | Annotation                                              | Pimer ID | Forward primer 5'-3'   | Reverse primer 5'-3'   |
|---------|---------------|---------------------------------------------------------|----------|------------------------|------------------------|
| DVU1922 | <i>hynA-1</i> | Periplasmic [NiFe] hydrogenase large subunit, isozyme 1 | A        | TCACGCCACAGAGCAGCTATAC | TCCCTTCAGGATGATCTCAAGC |
|         |               |                                                         | B        | CAAGAACCCGCATACCCAGTT  | AAGGTGATGAAGTTGGTGGTGC |
|         |               |                                                         | C        | GTATCTGCACGACCACATCGTG | GATATGGATGACGCGATCTTCG |
|         |               |                                                         | D        | ACATACATCCGCAACCTCGTTC | GATATGGATGACGCGATCTTCG |
|         |               |                                                         | E        | GCTGCAAAGCCAAGACAGCTCC | TTCGATTCGGGTACACAGGGTC |
|         |               |                                                         | F        | CCAAGCGCATCCAGGAATT    | TGGTGCCACCGTACTGTGTC   |
|         |               |                                                         | G        | AAGCGCATCCAGGAATTCAC   | TGGTGCCACCGTACTGTGTC   |
| DVU0533 |               | Hmc operon protein 4                                    | A        | CTACACCCTGCACGAGTTCATG | TGAGGAAGAGCCAGTAACCCAC |
|         |               |                                                         | B        | CTACACCCTGCACGAGTTCATG | GGAAGAGCCAGTAACCCACGTA |
|         |               |                                                         | C        | GCAATCTACACCCTGCACGAGT | AGGAAGAGCCAGTAACCCACGT |
|         |               |                                                         | D        | TGGATCAGGCAATCTACACCCT | GGAAGAGCCAGTAACCCACGTA |
|         |               |                                                         | E        | CAATCTACACCCTGCACGAGT  | GAGGAAGAGCCAGTAACCCAC  |
|         |               |                                                         | F        | CAATCTACACCCTGCACGAGT  | CGGTGAGGAAGAGCCAGTA    |
|         |               |                                                         | G        | ATCGAATGGATGGAAGTTCGG  | GCGAGAATCTGATTGTCCGGTG |
| DVU2402 | <i>hdrA</i>   | Heterodisulfide reductase subunit A                     | A        | ATCGAATGGATGGAAGTTCGG  | AGGACAGGCATAGTGC GTTGA |
|         |               |                                                         | B        | ATCGAATGGATGGAAGTTCGG  | AGGACAGGCATAGTGC GTTGA |
|         |               |                                                         | C        | GGCGAAACTCGACAAGACCTT  | GATGTTACCCTGAAAGTTGCC  |
|         |               |                                                         | D        | ATGGCGAAACTCGACAAGACC  | GATGTTACCCTGAAAGTTGCC  |
| DVU0145 |               | Response regulator                                      | A        | TCATCATCTGAGCGGACA     | GCGTTCGTAGACGTTTTTCGA  |
|         |               |                                                         | B        | ATGCTGCGGTTCATCATCCT   | AGGCGTTCGTAGACGTTTTTC  |
|         |               |                                                         | C        | CCAGCGACTATCTGCTCAAACC | TTTTGCCTCCCCTTCTTCG    |
|         |               |                                                         | D        | ACGATGCTGCGGTTCATCAT   | TTTTGCCTCCCCTTCTTCGA   |
| DVU0148 |               | Lipoprotein                                             | A        | ATGCTCTGCACCTTCTCGGTA  | TCATGAAGCGGAGCGGATACAC |
|         |               |                                                         | B        | TCAGCAGAACATCGACAGGCA  | TACCGAGAAGGTGCAGAGCAT  |
|         |               |                                                         | C        | ACGAAGGCCAACATCGTGA    | TACCGAGAAGGTGCAGAGCAT  |
|         |               |                                                         | D        | TTCTCGATGCCGATCATACA   | TCATGAAGCGGAGCGGATACAC |
| DVU0149 |               | hypothetical protein                                    | A        | CAAGTTCGGCAACGTCGACTAC | AGATCCAGCGAACGACCTTCTC |
|         |               |                                                         | B        | TCGGCAACGTCGACTACAAAC  | TAGATCCAGCGAACGACCTTTC |
|         |               |                                                         | C        | CAAGTTCGGCAACGTCGACTA  | TAGATCCAGCGAACGACCTTTC |
|         |               |                                                         | D        | GGTGCAGCGACCTACACATACA | ATCTGAACGCCCTGAACCATG  |
|         |               |                                                         | E        | TCGTAGAGGCTATCCTGCATGA | GCAACGAAAAGGCTCACATCTC |
| DVU0600 | <i>ldh</i>    | L-lactate dehydrogenase                                 | A        | GCATCGTAGAGGCTATCCTGCA | GGCAACGAAAAGGCTCACATCT |
|         |               |                                                         | B        | GCATCGTAGAGGCTATCCTGCA | GGCAACGAAAAGGCTCACATCT |
|         |               |                                                         | C        | TCGTAGAGGCTATCCTGCATG  | GGCAACGAAAAGGCTCACATCT |
|         |               |                                                         | D        | GCAGGGGCGAAGCAGATG     | GCACGTCGACACCCAGGA     |
|         |               |                                                         | E        | TCCTGCATGATGAGCACAGCGT | ATCCAGCACCTCTTCGATGCCA |
|         |               |                                                         | F        | CATCGTAGAGGCTATCCTGCA  | GCAACGAAAAGGCTCACATCTC |
|         |               |                                                         | G        | AAGCAGATGCCCGGTCAGT    | CATGGGTGAGGACATCGACG   |
|         |               |                                                         | H        | ATGAACAGGATAGCCGTCA    | GGCGTCTATGAGAACGATG    |
|         |               |                                                         | I        | TGCATGATGAGCACAGCGT    | GCATCCAGCACCTCTTCGAT   |
|         |               |                                                         | A        | AGATACGCATGAAGATCGGCA  | GGTCTGTATCTTGCGGATGTCC |
|         |               |                                                         | B        | GCCGTCATCTTCATCAACCAG  | GGTCTGTATCTTGCGGATGTCC |
| DVU1090 | <i>recA</i>   | Recombinase A                                           | C        | ATCGTGAAGAACAAGGTCGCC  | AAGGTGTTTCGATGAGCTTGGC |
|         |               |                                                         | D        | CATTGGAGACCGCTTTAGCAC  | TCGTCCGACAGTTTCATGACC  |
|         |               |                                                         | E        | GGCAACGCACTCAAGTTCTACA | GCGACCTTGTCTTCACGATCT  |
|         |               |                                                         | F        | TTCGCCTTCGGTTCAGAGAGAC | ATGCCAAGGTGTTTCGATGAGC |
|         |               |                                                         | G        | GCCGTCATCTTCATCAACCAG  | TCTGTATCTTGCGGATGTCCA  |
|         |               |                                                         | H        | GCCGTCATCTTCATCAACCAG  | TCCATACGGACGGAAGTGTAGA |
|         |               |                                                         | I        | GCCGTCATCTTCATCAACCA   | GTCTGTATCTTGCGGATGTCCA |
|         |               |                                                         | A        | CTTAACACATGCAAGTCCGCG  | TATTAGCGACCGTTTCCAGCC  |
|         |               |                                                         | B        | GCTTAACACATGCAAGTCCGCG | TATTAGCGACCGTTTCCAGCC  |
|         |               |                                                         | C        | CAACCCCTATTGCCAGTTGCT  | GCCATGATGACTGACGTCGT   |
|         |               |                                                         | D        | GATGAGTCCGCGTCCATTAG   | AGTGTGGCCGGTTCATCTCT   |
